# Supplementary material for: Stable transgenic C9orf72 zebrafish model key aspects of the ALS/FTD phenotype and reveal novel pathological features
Source: PubMed Central journal article supplement (PMC6240957; doi:10.1186/s40478-018-0629-7), 2018-11-19
Supplement: 40478_2018_629_MOESM1_ESM.pdf [file 40478_2018_629_MOESM1_ESM.pdf]

**ALS/FTD associated C9orf72 expansions activate the heat shock response and induce SOD1 proteinopathy.**

**Acta Neuropathologica**

**Matthew P. Shaw, Adrian Higginbottom, Alexander McGown, Lydia M. Castelli, Evelyn James, Guillaume M. Hautbergue, Pamela J. Shaw, and Tennore Ramesh**

**Sheffield Institute for Translational Neuroscience, University of Sheffield, 385  
Glossop Road, Sheffield, S10 2HQ, United Kingdom.**

**The Bateson Centre, Firth Court, The University of Sheffield, Western Bank,  
Sheffield, S10 2TN, United Kingdom**

**t.ramesh@sheffield.ac.uk**

**Online resource 1:**

**E Supplementary Doc-1**

-  ISceI meganuclease restriction site
-  Zebrafish ubiquitin promotor
-  GFP
-  (C4G2)<sub>89</sub> C9orf72 expansions
-  Heat shock promotor 70
-  DsRed

NB: Due to difficulties in sequencing GC rich DNA we were not able to obtain a sequencing read which spanned the entire C4G2 expansion, therefore expansion size is listed as 89 C4G2 repeats which is the minimum known size.

Listed below is the entire DNA sequence contained in a single transgene copy -

```
CAGGGTAATAGCTTTTAATCTCAAAAAACATTAATGAAATGCATACAAGGTTTT  
ATCCTGCTTTAGAACTGTTTGTATTTAATTATCAAATAAGACAGACAATCTA  
ATGCCAGTACACGCTACTCAAAGTTGTAACCTCAGATTTAACTTCAGTAGAAG  
CTGATTCTCAAATTGTTAGTGTCAAGCCTAGCTCTTTGGGGCTGAAAAGCAAT
```

CCTGCAGTGCTGAAAAGCCTCTCACAGGCAGCCGATGCGGGAAGAGGTGTATTA  
GTCTTGATAGAGAGGCTGCAAATAGCAGGAAACGTGAGCAGAGACTCCCTGGTG  
TCTGAAACACAGGCCAGATGGGTTTAAACGAATTCGTCGAGACCAGCAAAGTTC  
TAGAATTTGTCGAAACATTTATGTTATATATTTCTGAAAAAAATTCTGAGTAAG  
TTCTTAAGTGTTATTGCCAGCAACATAAACACAGACGGCAAATGAATAAATG  
ATAACAAAGCAGTAGGCTTAAATAAACCTAATTTTTATAGGCTGTTCTCTACAAC  
CCTCAAACAGTGATTAGTTTTGTACTTATAAACTTGCCCTTTCATTCATATTTCAA  
GAAAATTGGTTCAGAAGATCTGGATATTCTAGCAGTTGTTCAAGCTCATGGAGGG  
ATCAGTGACCTGATTCCACAATGACTAGGCCTAATCCAGAAATTAGATGACTGTC  
AACATAAAAAGGCACAGCACTCACTAGCTGCCCTATATATTTTTATTATATTTTAC  
ATATATTATTTATTTATTTAGCTCTGAGTGCTGTACTTTCTGGTTAAAGAAAAC  
GTTACAACAGCTAACCTGTACTACCTCAGGCTCAGGGAATTTGGAACAGGTTTG  
TCTGGTTTGTTCCTTAACCATGCATGCTTGTTCCTCAACTATGGCAACACAGTCAC  
ATGGGACATTACAGAAATGATTGTGCGATGACATGCGACTTTTCTTTAATAAAGC  
GCAAAGATCCCAAAAAGCAAACCTTTAACA AAAAATCATATAATTATATTTTCAAT  
CCAGCTTTGTAGCAACTTTGTGCTGCTGTTCACTCAGCAACAGATAGTCAGTATA  
AGGTCAGTGTGTCTCAAAGCAGTGCCATCTGTTTCACACATTGCGTTCTATATAT  
AAGTGTGCTGGTTGACACGACACTGTATAAGGCCTAGGCTAAAACACAAACAAT  
GTAGAATGACACTGTGTTTTTTTTGTAAACAATGTTGTTTTGGTTAAACATCTT  
TGTGAAAACATCCTCCTGTGATGTTTGTCTATATTCAAATGTTAAACCCGTGCA  
GAATAGAACATATACAAAAAAAACAACACAACACATTTTTAAACATTATTA  
TATCAAGTATTGCTGGCAGTTCTGTTTCTGTTTTACAGTACCCTTTGCCACAGTTC  
TCCGCTTTTCTGGTCCAGATTCCACAAGTCTGATTCACCAATAGCAAAGCGAAT  
AAACAACCAAGCAGCCAATCACTGCTTGTAGACTGTCCTGCGAGACCGGCCCA  
TTCCAGCACATTCTGGAAACTTCCTTTATATGATAATTATAAATACATTTAAATTA  
TTGATACAAAACATGTAATTCCTAGAACATAACCATAGCAATCATTAGTTTTCAG  
GGTAATTATGTATTTTTAGGATTTGACTGCGGAAAGATCTGGTCATGTGACGTCT  
CATGAACGTCACGGCCCTGGGTTTCTATAAATACAGTAGGACTCTCGACCATCGG  
CAGATTTTTCGAAGAAGAAGATCAGTTTCAGGAGCCGTACTGTTCCGTTTCAACG  
CAAATATTAACGGTAAGAGCGAATTCCTAGTTTGTTCATGCCATTCTTTAAAA  
CCATAGCGTATTACTTTAATTATAGTAAACTTTCGCTTTCTTTATTACAAGAGACG  
TTTTGTGTTGATTCTCCGCGGACATTTTCGGTCAGACAATCAGAAAATGACCGCG  
GAGGACCAGTAACTTGCATTACACGTAAGTTAAATCTTCGTGTATTA  
AATGGTTAGGTTGTTAACGTCAAATAGGTTACCGTGTTCGCGTGTGATCAGGTTGGTTTTGT  
AGATTTTTGTCAGTATTTTTAATTTATTTGTTTTAGTTTATTTATTTTTTTTGTGTA  
ATCATAGTTTGTGAACAAAGAACCCGGATGTTACATACAGTACAGCCGCCATGTT  
ACAGAGAGTTATAACTTAATCATTTTAAAAATAATTTTGCCTTACTTTTAGTTTGT  
CATGTTGAGAAATGAGGAAATGTTAAAATGAGGAAATATCCAATTAATTTAATA  
TATCAAATAATCCATGATTACAATGCACTGAACTGGAGAAAATTAAGATGTTTT  
CTAGTGTCATGAAACAAATGTAAGAGATGTACATTGTAGATGTTTTATGTCAAGA  
ATTGGCTAGTTGATGCAGCATACTGGCGATACTCAGTTGTAATAACAGTAACGTT  
ACATGTTAATAGACTACTGAGTATGCTGTTCTGTCTATGTATGCTCTGTAAGCTAC  
GAGAAGGACTTTTTTAAACAGTAAAGGGTGCAATATTTTTACAAATTGAATTA  
TAAAGGCTGTCTATTAAGTAATATGCTTGATATTTTTCTTACTTGATCGGAAATA  
GAAAAATATAACGTTGTTGCTCTAAAAATCCTAGTTCAGTTTAGCCAACCACA  
AATACCTTTTTGTTCTCCAACAGTTTTTTTTTCTTCTCTATAATATTGGCAGTCT

ATAGTACTCCAAATGTTTCCCCACAGTCTAACTAATTGGTACAGCCAAAATCATG  
ACACTTATTGCAATAATAATTTTGGTTCATTGGCATTGTTGATAGCCTGTGCCACT  
AATATGGTTCGATTGATCATGCTTCAGGAAGAAAACCTATATTGTTTGATGTAAGAT  
TATTAATCTTCACCTGCTTCCATTACAACTATTCCCATTATTGAATTCTGGT  
ATGTCTTAAAGGATTAGTTCACCTCCCAAATCAAATTTACTTAGCCTTTTTTTCAT  
CCATGATCCCTTTTTTTCATCATTAAATGAAGAAATTGTTTTTGAAAAAGTTTCAAG  
ATTTTTTCTCTATATTGTGGAGCTTGTTAGTTTAAAATTCCAAAATGCAATATGT  
GGCTTCAAATGGTTCTAAATGATCCCAGTCAAGGAATAACAGTCTTATCTAATGA  
AACCATTAGACCTTTAAAAATAAAAAAAATAAAAGTATTTATTTTTAAATGACTG  
AGTGATTAAGTTGAATTCAGCGTTTCCCTACTGTGTAGAAGTCCTTCCCTACTGG  
CCCCACCCTTGGTTCTCTGCCAATCTGCTACCTAATGTAATGTTGTGGAACATTA  
TTATTCTTTATTTCTTAATTTTTTATTTTTTATTTTAAAAACAATGTAAACTGCACAG  
ATGTGCAGTTTGTTTAAAATGGCCAATGCTTTGGAAATGCATGACATAATTAGAT  
TTCATGATGCACAAAGCCAAATCTCAGAGCTTGTGCAAAAATGAGCTATCATTTC  
CTAGGTAAGACCCTAAATTTTCATATAGGATCATTGGACAATTTTGCTGCAGGT  
AAAATGCATTCTATAGTCCACTGTCAGCCATTGTTTTGGATAGTATTTATTTTTCT  
CTACAAGTATAGTCAATAGTTTTCTATTATTTTAAAGGTTTGTAACATTTAAGGGT  
GACCAAATGCAAAGTAAAATTTTCAATTTTCGGGTGAACTATCTCGTTTAAACATGGG  
AGAAGTGCAAACATACATTATTGGCTAGAACATTGTAGTATTTTTTAAATGGAA  
ATGTGTGATTGCTAATCTTACTTTGAATTTGTTTACAGGGATCTATAACTTCGTAT  
AGTATACCTTATACGAAGTTATCGAGCTCATAACTTCGTATAGGATACTTTATAC  
GAAGTTATAACGTGCGAGATAACTTCGTATAGCATAACATTATACGAAGTTATAGGA  
TCAATGGTGAGCAAGGGCGAGGAGCTGTTACCGGGGTGGTGCCCATCCTGGTC  
GAGCTGGACGGCGACGTAAACGGCCACAAGTTCAGCGTGTCCGGCGAGGGCGAG  
GGCGATGCCACCTACGGCAAGCTGACCCTGAAGTTCATCTGCACCACCGGCAAG  
CTGCCCGTGCCCTGGCCCACCCTCGTGACCACCCTGACCTACGGCGTGCAGTGCT  
TCAGCCGCTACCCCGACCACATGAAGCAGCACGACTTCTTCAAGTCCGCCATGCC  
CGAAGGCTACGTCCAGGAGCGCACCATCTTCTTCAAGGACGACGGCAACTACAA  
GACCCGCGCCGAGGTGAAGTTCGAGGGCGACACCCTGGTGAACCGCATCGAGCT  
GAAGGGCATCGACTTCAAGGAGGACGGCAACATCCTGGGGCACAAGCTGGAGTA  
CAACTACAACAGCCACAACGTCTATATCATGGCCGACAAGCAGAAGAACGGCAT  
CAAGGTGAACTTCAAGATCCGCCACAACATCGAGGACGGCAGCGTGCAGCTCGC  
CGACCACTACCAGCAGAACACCCCATCGGCGACGGCCCCGTGCTGCTGCCCGA  
CAACCACTACCTGAGCACCCAGTCCGCCCTGAGCAAAGACCCCAACGAGAAGCG  
CGATCACATGGTCCTGCTGGAGTTCGTGACCGCCCGGGATCACTCTCGGCATG  
GACGAGCTGTACAAGAAAGCTGGGTCTAGATATCTCGAGG  
CCCCGGCCCCGGCCCCGGCCCCGGCCCCGGCCCCGGCCCCGGCCCCGGCCCCGG  
CCCCGGCCCCGGCCCCGTGAGGCCCGGCCCGGCCCGGCCCGGCCCGGCCCGGC  
CCCGGCCCGGCCCGGCCCGGCCCGGCCCGGCCCGGCCCGGCCCGGCCCGGCC  
CCGGCCCCGGCCCCGGCCCCGGCCCCGGCCCCGGCCCCGGCCCCGGCCCCGGCC  
CCGGCCCCGGCCCCGTGAGGCCCGGCCCGGCCCGGCCCGGCCCGGCCCGGCC  
CGGCCCGGCCCGGCCCGGCCCGGCCCGGCCCGGCCCGGCCCGGCCCGGCCCGG  
CGGCCCGGCCCGGCCCGGCCCGGCCCGGCCCGGCCCGGCCCGGCCCGGCCCGG  
GGCCCCGGCCCCGGCCCCGGCCCCGGCCCCGGCCCCGGCCCCGGCCCCGGCCCCG

– end of forward sequencing read

- end of reverse sequencing read

GGCCCCGGCCCCGGCCCCGGCCCCGGCCCCGGCCCCGGCCCCGGCCCCGGCCCC  
GGCCCCGGCCCCGGCCCCGGCCCCGGCCCCGGCCCCGGCCCCGGCCCCGGCCCC  
GGCCCCGGCCCCGGCCCCGGCCCCCTCGAGGCCCGGCCCGGCCCGGCCCGGCC  
CCCCGGCCCCGGCCCCGGCCCCGGCCCCGGCCCCGGCCCCGGCCCCGGCCCCGG  
CCCCGGCCCCGGCCCCGGCCCCGTGAGGCCCGGCCCGGCCCGGCCCGGCCCGGC  
CCCCGGCCCCGGCCCCGGCCCCGGCCCCGGCCCCGGCCCCGGCCCCGGCCCCGTCGACTCAC  
TACCTCCCTTTAAAGCCTGCTTTTTGTACATGTAGAATTCATGATGGGCAGTGTC  
GAGCTGAATCTGAGGGAGACTGAGCTGTGTCTTGGTCTTCCCGGTGGAGATACA  
GTGGCTCCGGTAACCGGAAACAAGAGAGGGTTCTCAGAGACGGTTGATCTGAAG  
CTAAATCTGAATAATGAGCCTGCAAACAAGGAAGGATCTACGACTCATGACGTC  
GTGACTTTTGATTCCAAGGAGAAGAGTGCTTGTCCCTAAAGATCCAGCCAAACCTC  
CGGCCAAGGCACAAGTTGTGGGATGGCCACCGGTGAGATCATACCGGAAGAACG  
TGATGGTTTCCTGCCAAAATCAAGCGGTGGCCCCGGAGGCGGCGGCGTTCGTGA  
AGGTATCAATGGACGGAGCACCGTACTTGAGGAAAATCGATTTGAGGATGTATA  
AAAGCTACGATGAGCTTTCTAATGCTTTGTCCAACATGTTTCAGCTCTTTTACCATG  
GGCAAACATGGAGGAGAAGAAGGAATGATAGACTTCATGAATGAGAGGAAATT  
GATGGATTTGGTGAATAGCTGGACTATGTTCCCTCTTATGAAGACAAAGACGGT  
GATTGGATGCTCGTCGGCGACGTTCCCTTGCCAATGTTTCGTCGATACATGCAAGC  
GTTTACGTCTCATGAAAGGATCGGATGCCATTGGTCTCGCTCCGAGGGCGATGGA  
GAAGTGCAAGAGCAGAGCTTAGCCCGGCGGCATGGACGAGCTGTACAAGTAATA  
CGTAGATCCAGACATGATAAGATAACATTGATGAGTTTGGACAAACCACAACCTAG  
AATGCAGTGAAAAAAATGCTTTATTTGTGAAATTTGTGATGCTATTGCTTTATTTG  
TAACCATTATAAGCTGCAATAAACAAGTTAACAACAACAATTGCATTTCATTTTAT  
GTTTTCAGGTTTCAGGGGGAGGTGTGGGAGGTTTTTAAATTCGCGGCCAACTTTAT  
ATACATAGTTGATAATTCAGTTGGCCGTCGTTTTACGGTACTACGGTACGGATCCT  
TCAGGGGTGGATCCTTCAGGGGTGTCGCTTGGTGATTTCCAAAATCAAATTAAT  
TTTATTAAACTATTAGAACGAGCATGTTTTGTCTATATGCTACAGAAGATAAAAA  
ATAATAGGAGTTAACAGTTATAAAACAACACACTTTGTTTCTATTGATTGTTGAC  
CACACTGGGGTCTCATTAAAGTTAGATTAAGACACACTAACTGGGTCAAATGCA  
GCAGATTGATTTTCATGGCACCAGGGTAAACTTTCTAACACTTTTACGGCAATCAT  
ATACATCAAATTAATAACAGGCCACGACTGAACAAGGAGGATGATCTCCAAA  
TTAAACAAGAGACTTGTGCCTATTTCTCTGAGGGTAAACATGACCTCTCAAGTT  
AGCAAGTTGTTTTAACACTACAAAAATAGTTAAGACTGCAATCCCAGAATAAA  
GTATTGGTTTTAACCAATCAATATAGTACAGTAAACATCCATTTGTTTTGTTGAAA  
CGTTAAACGAATCTGACCAAGCTATTAGCTTATATAAAACAGGTTTGCCTTTTAT  
GTAGCTGAAAATACCACAGGCCCGATTTGCTACTGTGTAACATTTTCAGCAAG  
ATTTTTTTTATATTGCATTTTTTTCTACTGAATCGTTCAAACATTTTATCATTTTAG  
TTGTTTCATTCATTGCAACTGGAAAAACAACACACCACACAACCGCACATTTTIC  
AGCAATAAGTACAATAAAACTCAAATAAAAAAAACTTTTTAAATCTCTTTGT  
ATTTTTGACCGCTGTTTCGCGTAATTTACGGTAAAACCTCTGGAAATCTCCACTAC  
ATCCTCTCAGCGGCTCCTCTCAATGACAGCTGAAGAAGTGACGCGGCTGCCTGC  
TGTGTTTTGATTGGTCGAATTCAGTGGGCTTCCAGAACAGTGTAGAGTCTGAA  
CGGGTGCGCGCTCTGCTGTATTTAAAGGGCGAAAGAGAGACCGCAGAGAACTC  
AACCGAAGAGAAGCGACTTGACAAAGAAGAAAAGAGCAGCCTGACAGGACTTT  
TCCCCGACGAGGTGTTTATTCGCTCTATTTAAGAATCTACTGTAAGGTAAGTCTC

AATATATTGTA CTCTAGTGGCTAATCAAAAATTTTATAGAGATTATATGTA CTCTAAT  
GTCAAAAAATCTACTTTGTATATGTAATCTTTTTACATGTGGACTGCCTATGTTCA  
TCTTATTTTAGGTCTACTAGAAAATTATATTTCCCGTTTTTACAATAAGGATTAA  
AAAAAAGCAATGAACAGACTGGCATTACTTTATGTTGCTGACATTATTATATA  
TGAGCATAATAACCATAAATACTAGCAAATGTCCTAAATGAATTTGTGTTAATGT  
TGTCTACAAAAGAAAAGAAAATTAGCGTTTTACTTGTACA ACTAATAA ACTTA  
GTTATTAAGAGAATTTCACTTGTGACTAGAAAAATCCTTTCATAATGAAACAAT  
TGCACCATAAATTGTATAAATAAAAATTAATTCTAATTGTTTTTTTTTTTCTGC  
AGTCGAGCGCCACC ATGGCCTACTCCGAGAAAGTCATCACCGAGTTCATGCGCTT  
CAAGGTGCGCATGGAGGGCACCGTGAACGGCCACGAGTTCGAGATCGAGGGCG  
AGGGCGAGGGCCGCCCTACGAGGGCCACAACAACGTGAAGCTGAAGGTGACC  
AAGGGCGGCCACCTGCCCTTCGCCTGGGACATCCTGTCCCACCAGTTCAGTACG  
GCTCCAAGGTGTACGTGAAGCACCCCGCCGACATCACCGACTACAAGAAGCTGT  
CATTCCCCGAGGGCTTCAAGTGGGAGCGCGTGATGAACTTCGAGGACGGCGGGCG  
TGGCGACAGTGACCCAGGACTCCTCCCTGCAGGACGGCTGCTTCATCTACAAGGT  
GAAGTTCATCGGAGTGA ACTTCACTCCGACGGCCCCGTGATGCAGAAGAAGAC  
CATGGGCTGGGAGGCCTCAACCGAGCGCATGTACCCCGCGACGGCGTGCTGAA  
GGGCGAGACCCACAAGGCCCTGAAGCTGAAGGACGGCGGCCACTACCTGGTGGA  
GTTCAAGTCCATCTACATGGACAAGAAGCCAGTGCAGCTGACCGGCTACTACTA  
CGTGGACGCCAAGCTGGACATCACCTCCCAACAACGAGGACTACACCATCGTGG  
GCAGTACGAGCGCACCGAGGGCCGCCACCACCTGTTCTAA GCGGCCGCGACTCT  
AGATCATAATCAGCCATAACCACATTTGTAGAGGTTTTACTTGCTTTAAAAAACCT  
CCCACACCTCCCCCTGAACCTGAAACATAAAAATGAATGCAATTGTTGTTGTTAAC  
TTGTTTATTGCAGCTTATAATGGTTACAAAATAAAGCAATAGCATCACAAATTTCA  
CAAATAAAGCATTTTTTTTCACTGCATTCTAGTTGTGGTTTGTCCAAACTCATCAAT  
GTATCTTAGGTACCTAGGGATAA
